# Supplementary material for: Genome-Wide Identification of GSTs Gene Family and Functional Analysis of <em>BraGSTF2 </em>of Winter Rapeseed (<em>Brassica rapa </em>L.) under Cold Stress
Source: Preprints.org preprint supplement (doi:10.20944/preprints202307.1867.v1), 2023-07-27
Supplement: Supplementary file 1 [file supplementary]

Table S1 Prediction of physicochemical properties and secondary structure of *BraGST*

| Protein name     | Number of amino acids | pI   | Instability index | Aliphatic index | Grand average of hydropathicity | Alpha helix | Beta bridge | Random coil |
|------------------|-----------------------|------|-------------------|-----------------|---------------------------------|-------------|-------------|-------------|
| <i>BraDHAR3</i>  | 257                   | 9.35 | 30.7              | 70.1            | -0.4                            | 15          | 4           | 47          |
| <i>BraDHAR1</i>  | 210                   | 6.83 | 36.8              | 96.1            | 0                               | 30          | 11          | 86          |
| <i>BraDHAR4</i>  | 213                   | 5.79 | 42.1              | 103             | -0.1                            | 33          | 15          | 65          |
| <i>BraGSTF1</i>  | 213                   | 5.66 | 38.1              | 90.2            | -0.3                            | 33          | 14          | 72          |
| <i>BraGSTF10</i> | 215                   | 6.76 | 28.1              | 90.7            | -0.2                            | 33          | 13          | 71          |
| <i>BraGSTF11</i> | 210                   | 6.41 | 28                | 93              | -0.3                            | 35          | 12          | 70          |
| <i>BraGSTF12</i> | 213                   | 5.13 | 39                | 87.8            | -0.2                            | 19          | 7           | 61          |
| <i>BraGSTF13</i> | 215                   | 5.76 | 43.5              | 90.6            | -0.2                            | 33          | 9           | 85          |
| <i>BraGSTF14</i> | 254                   | 6.67 | 34.3              | 93              | -0.3                            | 34          | 12          | 71          |
| <i>BraGSTF15</i> | 248                   | 6.25 | 35.5              | 89.3            | -0.4                            | 25          | 13          | 62          |
| <i>BraGSTF16</i> | 210                   | 7.71 | 33                | 91.5            | -0.2                            | 33          | 14          | 81          |
| <i>BraGSTF17</i> | 231                   | 5.98 | 38.6              | 90.2            | -0.2                            | 31          | 11          | 75          |
| <i>BraGSTF18</i> | 264                   | 5.79 | 35.9              | 96.6            | -0.1                            | 15          | 10          | 47          |
| <i>BraGSTF19</i> | 215                   | 6.17 | 38.7              | 90.2            | -0.2                            | 34          | 16          | 70          |
| <i>BraGSTF2</i>  | 213                   | 5.14 | 36.7              | 97.8            | -0.1                            | 30          | 18          | 62          |
| <i>BraGSTF20</i> | 215                   | 5.91 | 35.3              | 84.4            | -0.3                            | 32          | 9           | 65          |
| <i>BraGSTF3</i>  | 213                   | 5.05 | 40.6              | 89.4            | -0.3                            | 20          | 10          | 77          |
| <i>BraGSTF4</i>  | 213                   | 5.98 | 39.2              | 88.6            | -0.3                            | 23          | 11          | 77          |
| <i>BraGSTF5</i>  | 213                   | 5.44 | 39.2              | 83.6            | -0.3                            | 31          | 8           | 67          |
| <i>BraGSTF6</i>  | 251                   | 5.1  | 28.5              | 79.7            | -0.3                            | 34          | 12          | 64          |
| <i>BraGSTF7</i>  | 215                   | 5.43 | 38                | 82.8            | -0.4                            | 31          | 12          | 61          |
| <i>BraGSTF8</i>  | 181                   | 5.11 | 38.3              | 87.7            | -0.3                            | 29          | 17          | 55          |
| <i>BraGSTF9</i>  | 482                   | 5.45 | 44.5              | 80.1            | -0.3                            | 31          | 12          | 58          |
| <i>BraGSTL1</i>  | 297                   | 5.32 | 36.9              | 83.7            | -0.3                            | 25          | 10          | 63          |
| <i>BraGSTL2</i>  | 459                   | 6.36 | 37.7              | 77.4            | -0.5                            | 29          | 14          | 67          |
| <i>BraGSTT1</i>  | 241                   | 5.29 | 32.1              | 81.1            | -0.4                            | 36          | 9           | 64          |
| <i>BraGSTT2</i>  | 246                   | 5.75 | 32                | 93.5            | -0.2                            | 29          | 7           | 55          |
| <i>BraGSTT3</i>  | 181                   | 5.42 | 37.7              | 87.7            | -0.3                            | 26          | 14          | 5           |
| <i>BraTCHQD</i>  | 266                   | 5.33 | 33.8              | 79.2            | -0.4                            | 36          | 10          | 67          |
| <i>BraGSTU1</i>  | 232                   | 6.13 | 37.6              | 100             | -0.3                            | 26          | 12          | 63          |
| <i>BraGSTU10</i> | 227                   | 6.04 | 47.7              | 95.3            | -0.3                            | 30          | 12          | 58          |
| <i>BraGSTU11</i> | 224                   | 6.17 | 57.4              | 95.3            | -0.2                            | 28          | 11          | 57          |
| <i>BraGSTU12</i> | 249                   | 6.04 | 44.2              | 98.4            | -0.3                            | 29          | 11          | 62          |
| <i>BraGSTU13</i> | 227                   | 7.71 | 34.7              | 95.7            | -0.2                            | 26          | 11          | 60          |
| <i>BraGSTU14</i> | 227                   | 5.17 | 41.9              | 106             | -0.1                            | 28          | 10          | 60          |
| <i>BraGSTU15</i> | 219                   | 5.28 | 43.4              | 86.7            | -0.3                            | 28          | 7           | 53          |
| <i>BraGSTU17</i> | 224                   | 6.14 | 34.7              | 87.3            | -0.1                            | 26          | 9           | 67          |
| <i>BraGSTU18</i> | 116                   | 5.84 | 43                | 90.5            | -0.4                            | 34          | 7           | 72          |
| <i>BraGSTU19</i> | 221                   | 5.61 | 34.8              | 94.1            | -0.2                            | 25          | 9           | 64          |
| <i>BraGSTU2</i>  | 232                   | 6.13 | 36.9              | 91.2            | 0                               | 26          | 13          | 59          |

|                  |     |      |      |       |      |     |    |     |
|------------------|-----|------|------|-------|------|-----|----|-----|
| <i>BraGSTU20</i> | 164 | 5.59 | 47.7 | 100   | -0.1 | 25  | 9  | 63  |
| <i>BraGSTU21</i> | 218 | 9.17 | 53.6 | 78.3  | -0.3 | 30  | 11 | 62  |
| <i>BraGSTU22</i> | 220 | 5.49 | 36.1 | 91.1  | 0    | 27  | 12 | 64  |
| <i>BraGSTU23</i> | 215 | 4.84 | 31.2 | 85.1  | -0.1 | 28  | 13 | 59  |
| <i>BraGSTU24</i> | 219 | 5.32 | 44.2 | 92.8  | -0.1 | 30  | 11 | 64  |
| <i>BraGSTU25</i> | 219 | 7.71 | 30.6 | 99.7  | -0.1 | 30  | 16 | 7   |
| <i>BraGSTU27</i> | 219 | 5.47 | 43.6 | 99.1  | -0.3 | 29  | 17 | 56  |
| <i>BraGSTU28</i> | 219 | 5.86 | 33.4 | 101.6 | -0.3 | 28  | 12 | 58  |
| <i>BraGSTU29</i> | 219 | 5.57 | 56.7 | 101.5 | -0.3 | 27  | 16 | 60  |
| <i>BraGSTU3</i>  | 234 | 5.23 | 44.9 | 91.6  | -0.1 | 35  | 12 | 68  |
| <i>BraGSTU30</i> | 220 | 9.5  | 44.9 | 93.5  | -0.2 | 21  | 15 | 88  |
| <i>BraGSTU31</i> | 227 | 9.36 | 42.1 | 92.8  | -0.2 | 29  | 14 | 82  |
| <i>BraGSTU32</i> | 224 | 9.11 | 52   | 81.1  | -0.3 | 32  | 14 | 75  |
| <i>BraGSTU33</i> | 228 | 5.31 | 36.4 | 97.1  | -0.2 | 25  | 11 | 67  |
| <i>BraGSTU34</i> | 398 | 9.12 | 27.1 | 88.9  | -0.4 | 30  | 16 | 77  |
| <i>BraGSTU35</i> | 224 | 5.16 | 40   | 85.6  | -0.3 | 27  | 20 | 81  |
| <i>BraGSTU36</i> | 224 | 6.98 | 32.4 | 83.1  | -0.2 | 30  | 14 | 73  |
| <i>BraGSTU37</i> | 224 | 8.32 | 35.7 | 80.8  | -0.3 | 38  | 6  | 92  |
| <i>BraGSTU38</i> | 225 | 8.51 | 48.4 | 89.1  | -0.1 | 42  | 22 | 94  |
| <i>BraGSTU39</i> | 226 | 9.28 | 47.6 | 92.2  | -0.4 | 30  | 12 | 61  |
| <i>BraGSTU4</i>  | 182 | 6.84 | 51.7 | 82.8  | -0.4 | 37  | 7  | 152 |
| <i>BraGSTU26</i> | 234 | 6.7  | 39   | 71    | -0.5 | 49  | 8  | 162 |
| <i>BraGSTU5</i>  | 230 | 5.06 | 43   | 86    | -0.2 | 64  | 46 | 133 |
| <i>BraGSTU6</i>  | 255 | 5.58 | 31.9 | 79.4  | -0.3 | 60  | 11 | 175 |
| <i>BraGSTU7</i>  | 228 | 5.54 | 33.7 | 77.2  | -0.3 | 62  | 12 | 164 |
| <i>BraGSTU8</i>  | 228 | 4.99 | 35.4 | 87.9  | -0.3 | 50  | 19 | 146 |
| <i>BraGSTU9</i>  | 228 | 9.04 | 50.4 | 88.6  | -0.1 | 84  | 32 | 205 |
| <i>BraGSTZ1</i>  | 216 | 5.39 | 39.8 | 100.8 | 0.2  | 147 | 44 | 208 |
| <i>BraGSTZ2</i>  | 600 | 9.54 | 43.8 | 78.8  | -0.4 | 109 | 23 | 290 |
| <i>BraGSTU16</i> | 114 | 5.52 | 54.2 | 71.8  | -0.5 | 18  | 6  | 27  |

---
